# Supplementary material for: A self-assembled triphenylamine-based fluorescent chemosensor for selective detection of Fe3+ and Cu2+ ions in aqueous solution
Source: Royal Society of Chemistry journal article supplement (doi:10.1039/c4ra12025f), 2014-12-16
Supplement: c4ra12025f1.pdf [file c4ra12025f1.pdf]

## Electronic Supporting Information

### Self-assembled triphenylamine-based fluorescent chemosensor for selectively detection of Fe<sup>3+</sup> and Cu<sup>2+</sup> ions in aqueous solution

Li Wengfeng, Ma Hengchang<sup>\*a</sup>, Lu cong, Ma Yuan, Qi Chunxuan, Zhang Zhongwei, Yang Zengming, Cao Haiying, Lei ziqiang<sup>\*b</sup>

Key Laboratory of Eco-Environment-Related Polymer Materials of Ministry of Education, College of Chemistry and Chemical Engineering, Northwest Normal University, Lanzhou 730070, Gansu, China

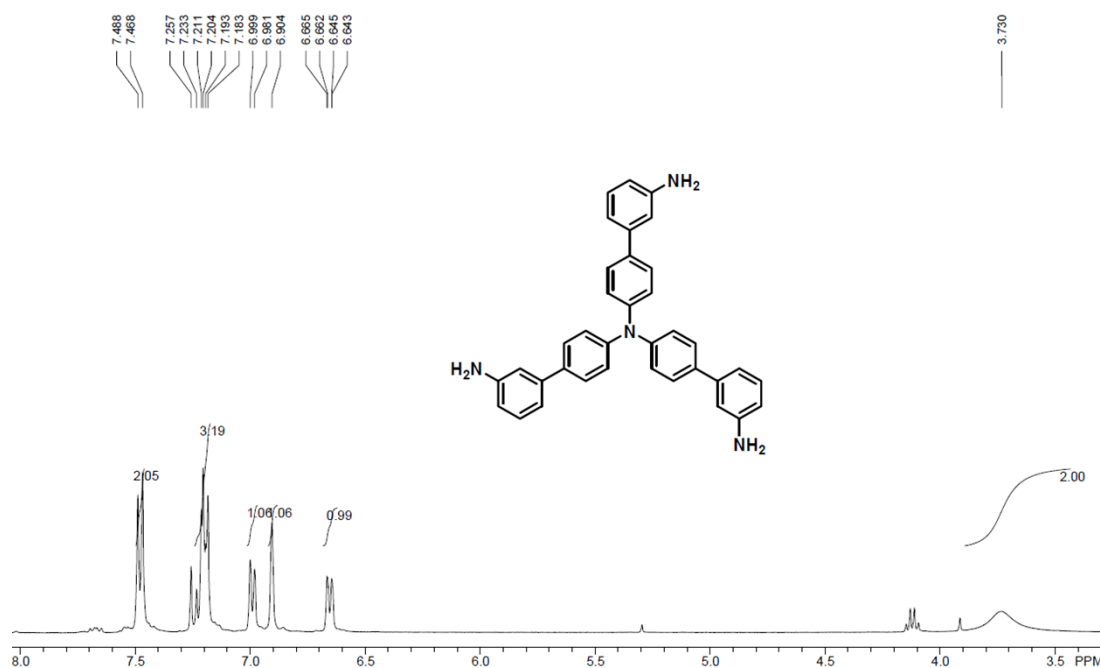

Fig. 1. <sup>1</sup>H NMR spectrum of *m*-TAPA.

<sup>\*a</sup> Key Laboratory of Eco-Environment-Related Polymer Materials of Ministry of Education, College of Chemistry and Chemical Engineering, Northwest Normal University, Lanzhou 730070, Gansu, China. E-mail: mahczju@hotmail.com

<sup>\*b</sup> Key Laboratory of Eco-Environment-Related Polymer Materials of Ministry of Education, College of Chemistry and Chemical Engineering, Northwest Normal University, Lanzhou 730070, Gansu, China. E-mail: leizq@nwnu.edu.cn

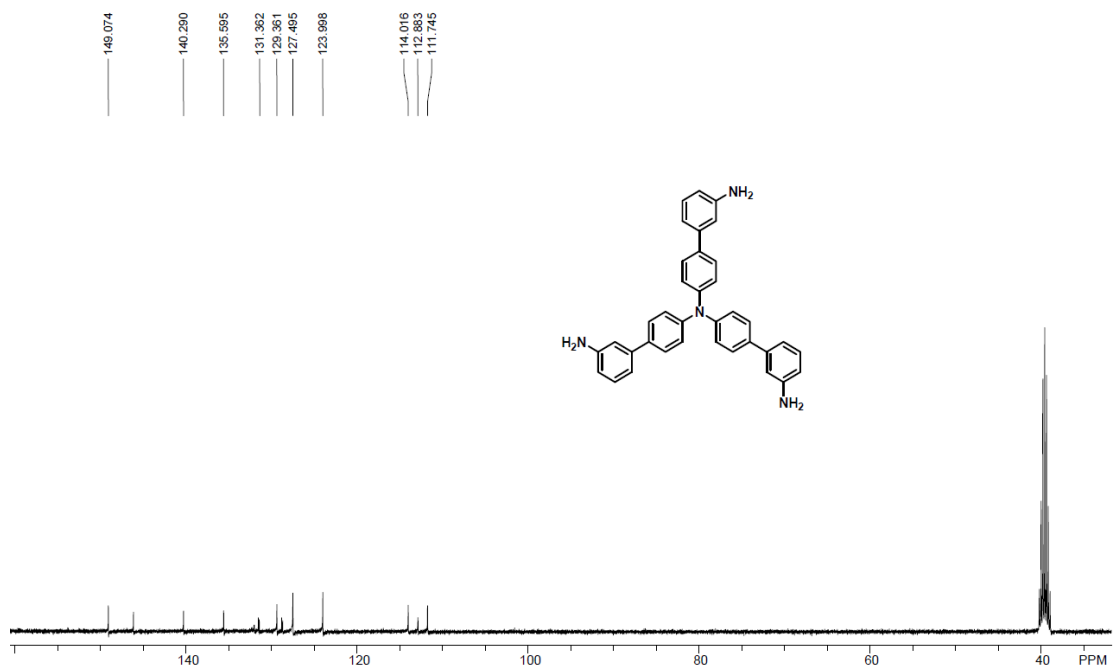

**Fig. 2.** <sup>13</sup>CNMR spectrum of *m*-TAPA.
